# Supplementary material
Source: PubMed Central journal article supplement (PMC9085970)

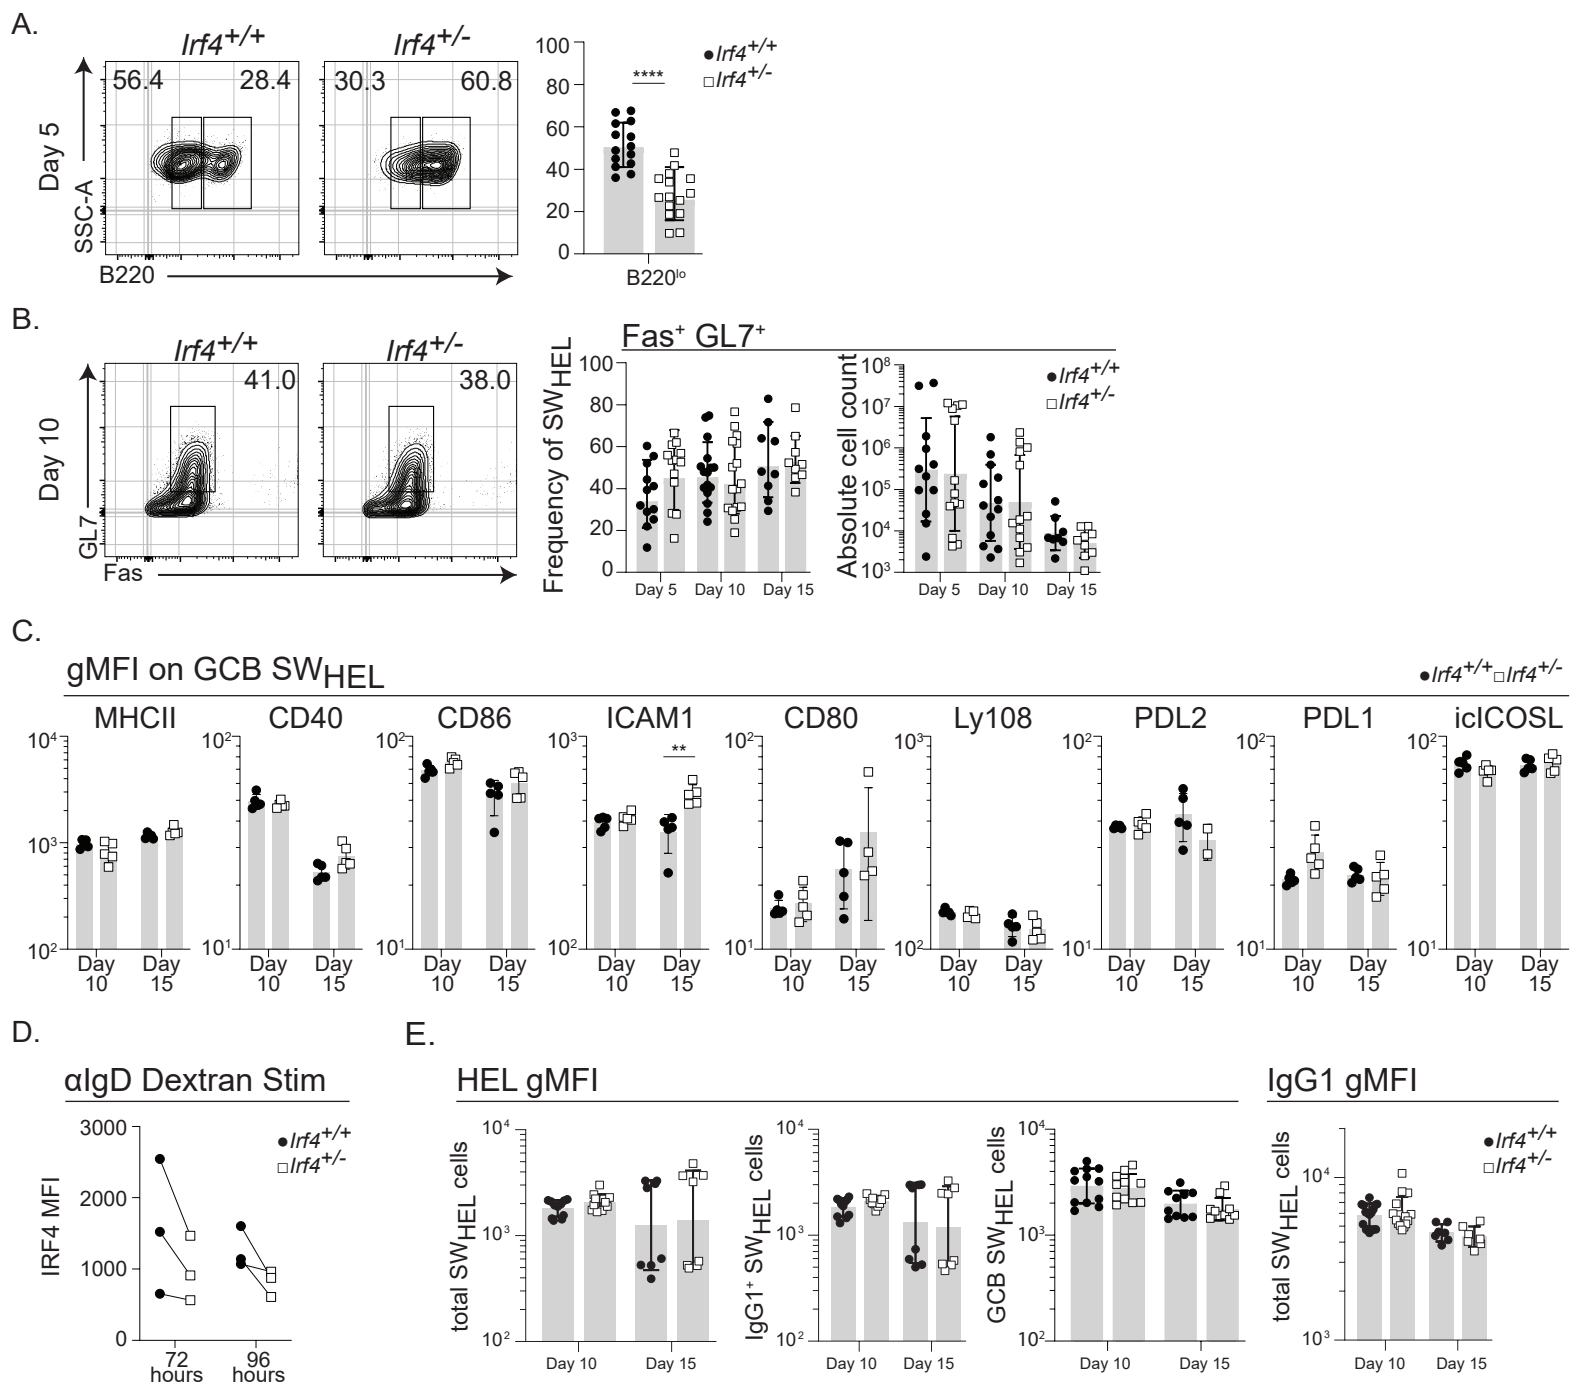

### Supplementary Figure 1

A) Representative flow cytometry plots and frequency of B220<sup>lo</sup> SW<sub>HEL</sub> cells identified as CD45.2<sup>+</sup>CD45.1<sup>-</sup>CD3<sup>-</sup>B220<sup>+</sup>HEL<sup>WT+</sup> day 5 after immunization. B) Representative flow cytometry plots, frequency, and absolute cell counts of GL7<sup>+</sup>Fas<sup>+</sup> GCBs at the indicated time points after immunization identified as CD45.2<sup>+</sup>CD45.1<sup>-</sup>CD3<sup>-</sup>B220<sup>+</sup>HEL<sup>WT+</sup>. C) gMFIs of relevant receptors on donor-specific GCBs, identified as CD45.2<sup>+</sup>CD45.1<sup>-</sup>CD3<sup>-</sup>B220<sup>+</sup>HEL<sup>WT+</sup>CD38<sup>lo</sup>Fas<sup>+</sup>. D) In vitro analysis of IRF4 expression levels between *Irf4*<sup>+/+</sup> and *Irf4*<sup>+/-</sup> B cells. Equivalent numbers of CD45.2<sup>+</sup>CD45.1<sup>-</sup> *Irf4*<sup>+/+</sup> or CD45.2<sup>+</sup>CD45.1<sup>-</sup> *Irf4*<sup>+/-</sup> B cells were stimulated in cocultures with  $\alpha$ IgD-Dextran and analyzed at 72 or 96 hours for expression of the CD45 allotypic markers and IRF4 by flow cytometry. E) BCR expression; HEL<sup>WT+</sup> gMFI on total SW<sub>HEL</sub>, IgG1<sup>+</sup> SW<sub>HEL</sub>, or SW<sub>HEL</sub> GCBs. Panel on right is IgG1 gMFI on total SW<sub>HEL</sub> on day 10 and 15. We note that, in some panels, dots that cluster together represent mice from separate experiments. Experiment in (A) is from 15 mice in 4 experiments performed. Experiment in (B) is from 16 mice in 4 experiments performed, while (C) is from 5 mice in 1 experiment performed; contour plots are concatenated files from all mice of a given group in a given experiment. Experiments in (E) are from 12 mice in 3 experiments performed. Unpaired t tests were performed to determine significance: all ns, not significant ( $p > 0.05$ ), unless noted. \*\*  $p \leq 0.01$ , \*\*\*\*  $p \leq 0.0001$ .

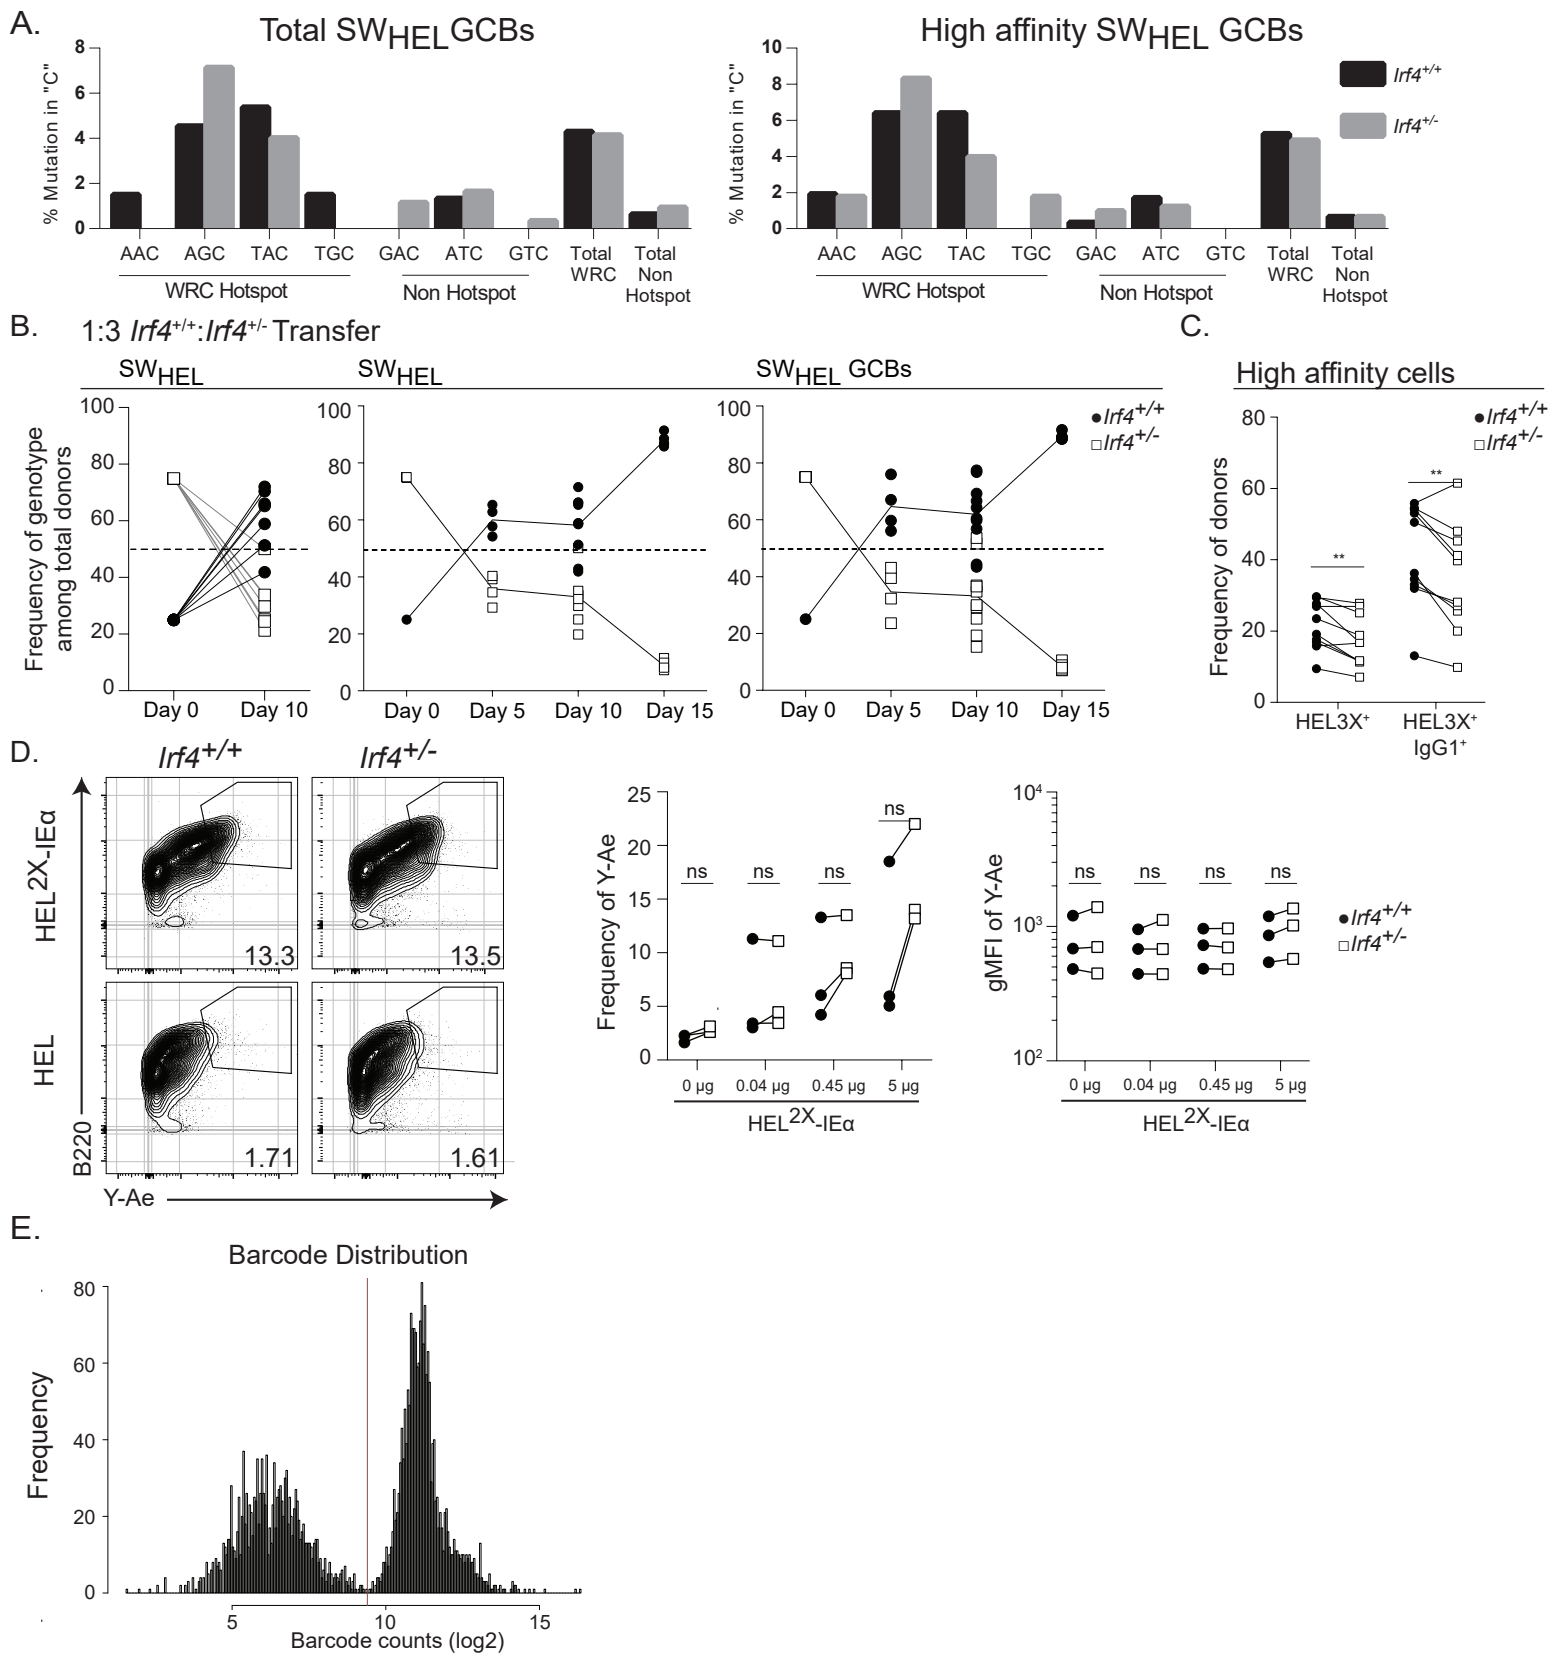

### Supplementary Figure 2

A) Frequency of mutated “C” in either *Irf4*<sup>+/+</sup> or *Irf4*<sup>+/-</sup> total or high affinity clones within “WRC” AID hotspot motif sequences over the VDJ. B) Frequency of *Irf4*<sup>+/+</sup> and *Irf4*<sup>+/-</sup> total SW<sub>HEL</sub> cells or total SW<sub>HEL</sub> GCBs at indicated time points, 1:3 initial cotransfer (*Irf4*<sup>+/+</sup> : *Irf4*<sup>+/-</sup>), transfer and immunization as in **Fig. 2A**. C) Frequency of high affinity SW<sub>HEL</sub> or IgG1<sup>+</sup> SW<sub>HEL</sub> cells, 1:3 initial cotransfer (*Irf4*<sup>+/+</sup> : *Irf4*<sup>+/-</sup>). Lines linking dots denote measurements from a single mouse. D) Equal numbers of *Irf4*<sup>+/+</sup> and *Irf4*<sup>+/-</sup> SW<sub>HEL</sub> cells were cultured in vitro with indicated amounts of HEL<sup>2X</sup>-IE $\alpha$  or HEL, and MHCII presentation of IE $\alpha$  was measured by Y-Ae frequency and gMFI. *Irf4*<sup>+/+</sup> cells were distinguished from *Irf4*<sup>+/-</sup> by CFSE labeling. Flow cytometry plots shown are representative of 3 separate co-culture experiments and lines linking dots denote measurements from a single well. Paired t tests were performed to determine significance: \*\*  $p \leq 0.01$ , ns, not significant ( $p > 0.05$ ). E) Frequency of cells in the scRNA-seq experiment having a given number of sequences encoded by the anti-CD45.1 CITE-seq approach; line represents gating for genotype calling of single cells.



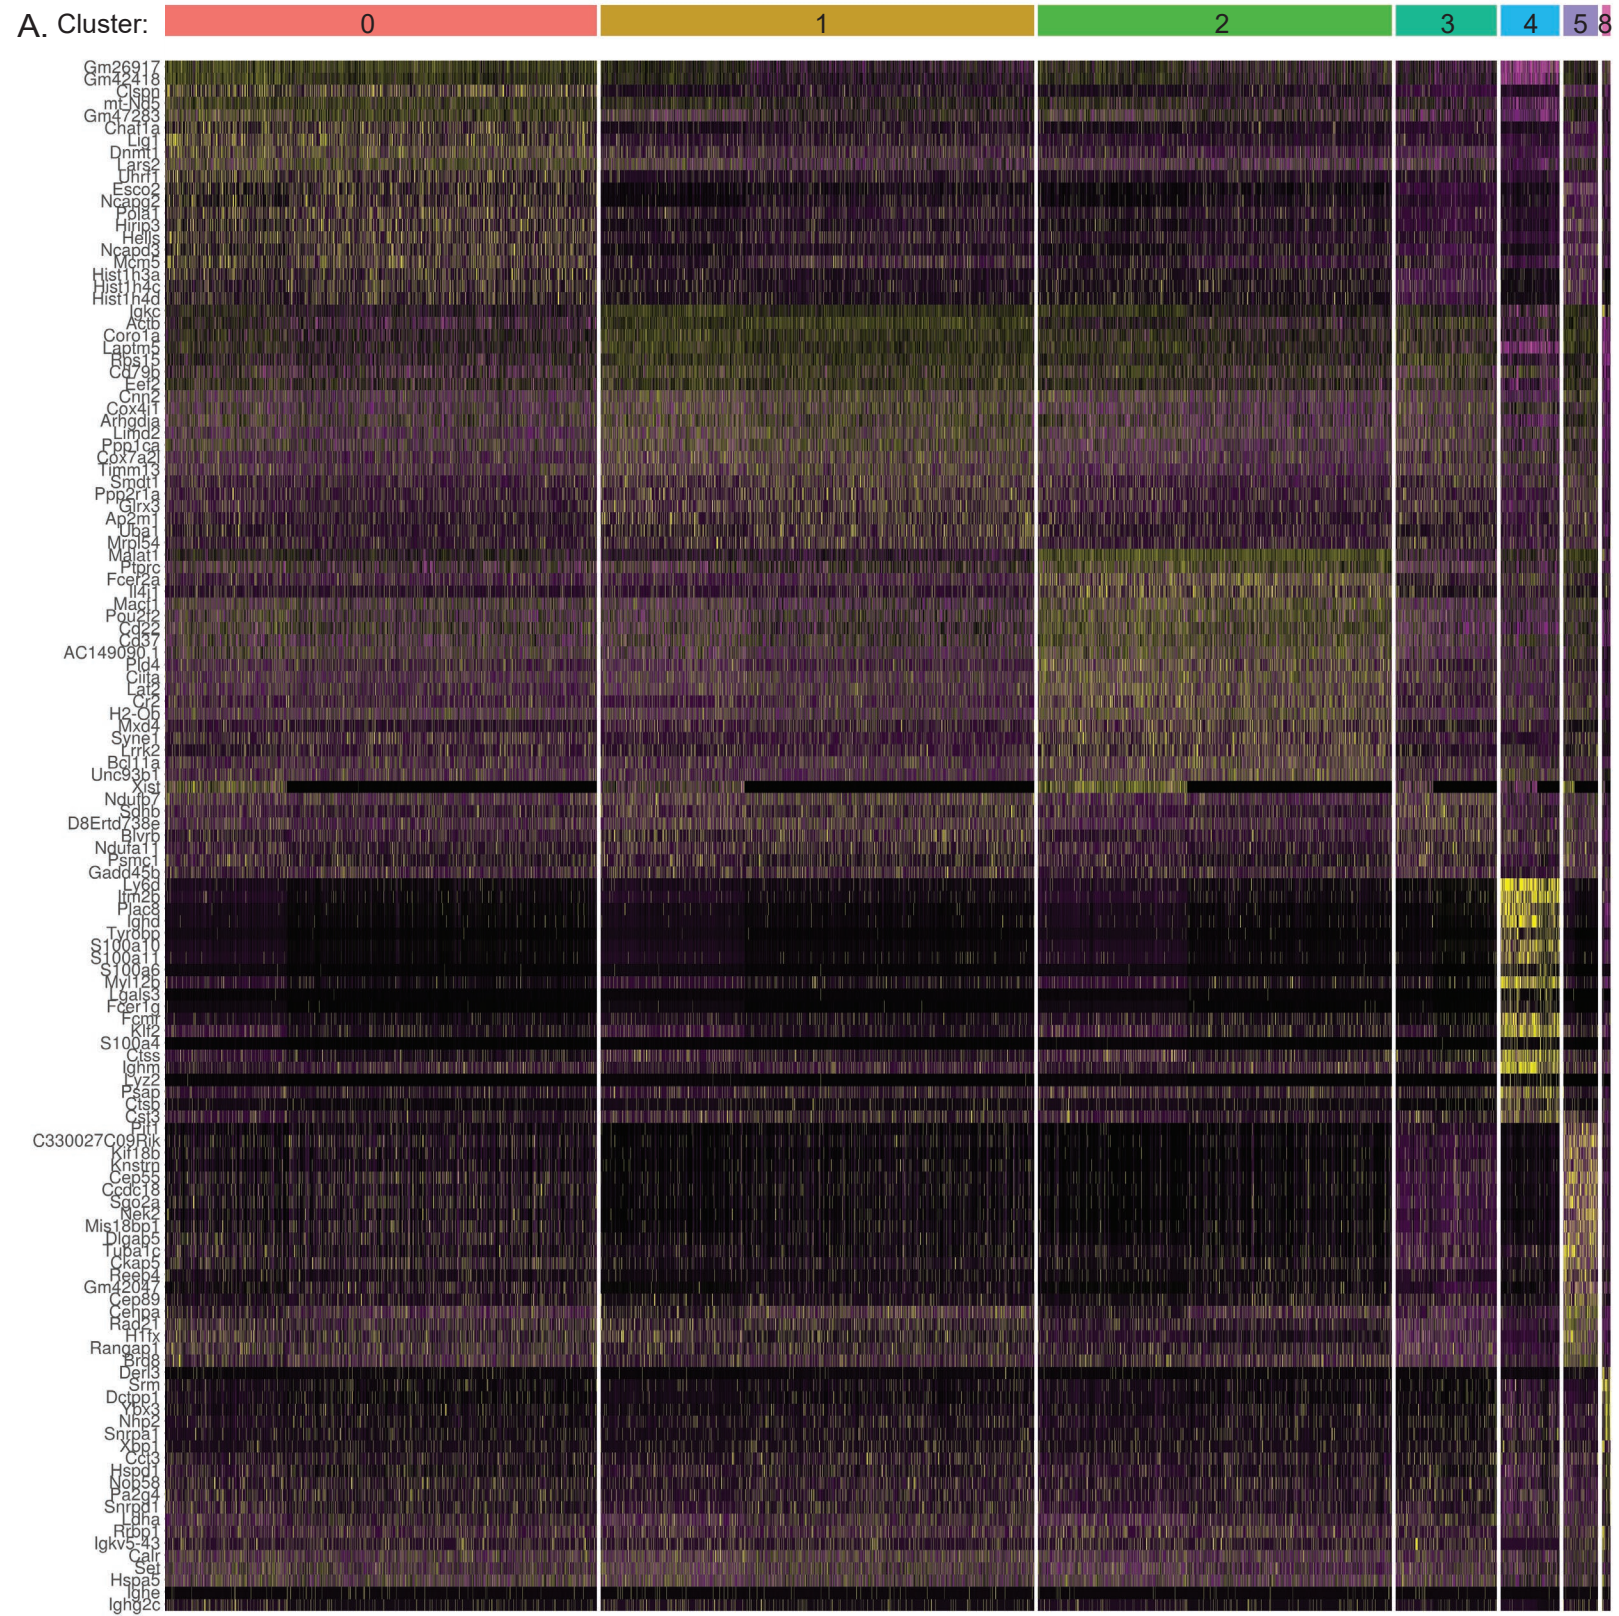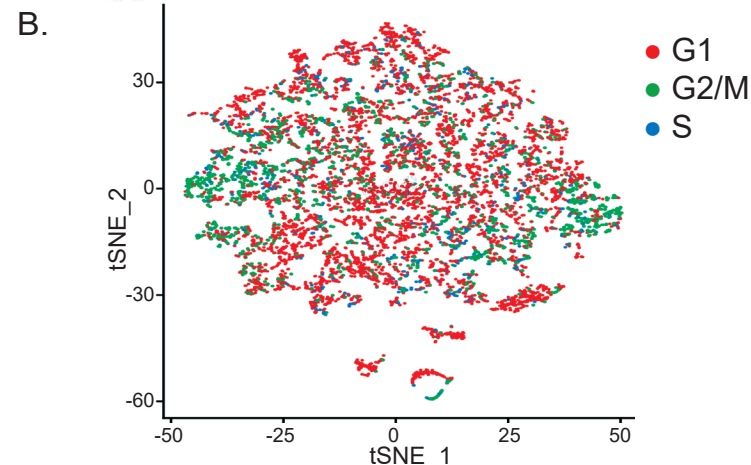

**Supplementary Figure 3**  
 A) Heat map displaying relative expression of genes that most distinguished identified clusters. B) Distribution of cells expressing signature genes of the G1, G2/M, or S phase of the cell cycle in the t-SNE reduction projection.

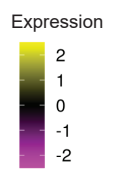

Supplement: NIHMS1745581-supplement-1.pdf [file NIHMS1745581-supplement-1.pdf]
